# Supplementary material
Source: HighWire-hosted journal article supplement (https://bmjopen.bmj.com/content/7/1/e014151)
Supplement: inline-supplementary-material-1 [file inline-supplementary-material-1.pdf]

# Setting up a singing group like Sing Your Lungs Out

We provide links below to two short videos of this singing group and a “10 practical top tips ” document for setting up a community singing group for people living with COPD which we hope will inform, motivate and encourage others to set up singing groups.

[https://www.dropbox.com/sc/boc5sr7hkcbi6tz/AAAlbUQqOWyvDeJGTnoXVcg-a?preview=NO\\_Graphics\\_02.mp4](https://www.dropbox.com/sc/boc5sr7hkcbi6tz/AAAlbUQqOWyvDeJGTnoXVcg-a?preview=NO_Graphics_02.mp4)

<https://www.youtube.com/watch?v=fduau0jV09o>

[http://www.mrinz.ac.nz/pdfs/How\\_to\\_set\\_up\\_SYLO.pdf](http://www.mrinz.ac.nz/pdfs/How_to_set_up_SYLO.pdf)
